# Supplementary material for: Canavanine Increases the Content of Phenolic Compounds in Tomato (Solanum lycopersicum L.) Roots
Source: PubMed Central journal article supplement (PMC7698470; doi:10.3390/plants9111595), 2020-11-17
Supplement: plants-09-01595-s001.pdf [file plants-09-01595-s001.pdf]

**Table S1.** List of the primers used for RT-qPCR experiments

| Gene name   | Gene ID (NCBI) | Primers sequences 5'-3'                               | PCR product length (bp) |
|-------------|----------------|-------------------------------------------------------|-------------------------|
| <i>PAL1</i> | XM_026029821.1 | F: ACTTGTGAATGGCACAGCAG<br>R: GGCTTCCGTTTCATCACTTC    | 123                     |
| <i>PAL2</i> | NM_001320601.1 | F: GTTTGCCTTCGAATCTCACC<br>R: TACGAGGCCATAGCGATTTTC   | 82                      |
| <i>PAL3</i> | NM_001320609.1 | F: GAGATCGACAAGGTGTTTCACAG<br>R: TTTCTGGCAAGCATCTAGCA | 116                     |
| <i>PAL4</i> | XM_004246601.3 | F: CGGTGAGGAGATTGACAAGG<br>R: CCATTCCAGCTCTTGAGACAC   | 87                      |
| <i>PAL5</i> | NM_001320040.1 | F: CTGGCAGGCCTAATTCAAAG<br>R: AACACCAGCCACATGAAACG    | 80                      |
| <i>PAL6</i> | XM_004249510.4 | F: TGAGACGTTGAATGCTGAGG<br>R: AGCCAAACCAGAACCAACAG    | 121                     |
| <i>PPOA</i> | XM_004245981.4 | F: ATTTGGGTTGGTACGAGACG<br>R: ATTCGTTCCACATCCTGTCC    | 142                     |
| <i>PPOB</i> | NM_001309397.1 | F: GCTATCAACAGGCCAGCTTC<br>R: ATCATTCTCGCCAGCTCTGT    | 219                     |
| <i>PPOD</i> | NM_001309397.1 | F: TTGGCGGACCTTATGATCTC<br>R: TGGGCAAAGTTGAACCTCTC    | 114                     |
| <i>PPOE</i> | XM_004245993.4 | F: CACCACTCCCAAAGACCTAAC<br>R: GTGCGGCTGGTCTAATTTTG   | 81                      |
